# Supplementary material
Source: Springer Nature journal article supplement (https://www.springermedizin.de/resource/supplementary/12969_2010_804_MOESM5_ESM.pdf/9593044)

(a)

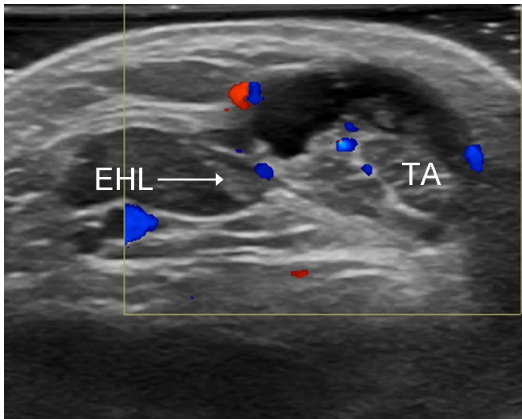

(b)

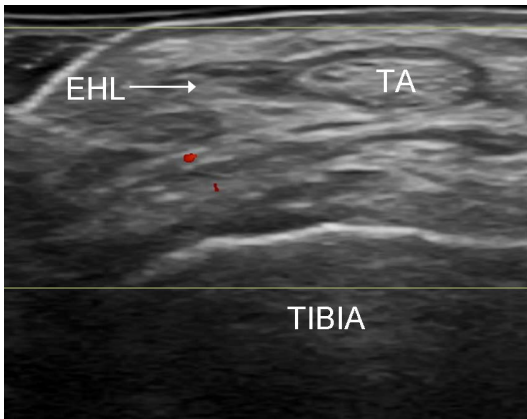

Supplement: MOESM5 [file 9593044]
